# Supplementary material
Source: PubMed Central journal article supplement (PMC5109995)
Supplement: mnp-0002-0124-s01.pdf [file mnp-0002-0124-s01.pdf]

Supplementary table 1

Summary of the homogeneity of variance and statistical information in two-way, one repeated measured ANOVA

| fig.                                |                | 2a                    | 2b                    | 2c                              | 4a                            | 4b                            | 4c                             | 5a                            | 5b                            | 5c                             | Supple. Fig. 2a        | Supple. Fig. 2b                |
|-------------------------------------|----------------|-----------------------|-----------------------|---------------------------------|-------------------------------|-------------------------------|--------------------------------|-------------------------------|-------------------------------|--------------------------------|------------------------|--------------------------------|
| <i>Mauchly's test of sphericity</i> | <i>P value</i> | 0.812                 | 0.357                 | <0.001*                         | 0.002*                        | <0.001*                       | <0.001*                        | <0.001*                       | <0.001*                       | <0.001*                        | 0.064                  | <0.001*                        |
| <i>Greenhouse-Geiser</i>            | <i>epsilon</i> | -                     | -                     | 0.49                            | 0.673                         | 0.553                         | 0.335                          | 0.697                         | 0.693                         | 0.513                          | -                      | 0.324                          |
| <i>Interaction</i>                  | <i>F</i>       | $F_{6,69}$<br>= 0.745 | $F_{8,92}$<br>= 1.103 | $F_{8,827,101.516}$<br>= 3.623  | $F_{4,041,46.471}$<br>= 1.124 | $F_{4,428,50.917}$<br>= 1.477 | $F_{6,039,69.448}$<br>= 0.787  | $F_{4,184,48.111}$<br>= 0.42  | $F_{5,546,63.781}$<br>= 2.289 | $F_{9,227,106.110}$<br>= 0.756 | $F_{8,92}$<br>= 1.126  | $F_{3,837,67.121}$<br>= 4.975  |
|                                     | <i>P value</i> | 0.6154                | 0.3686                | <0.001                          | 0.357                         | 0.219                         | 0.584                          | 0.801                         | 0.0502                        | 0.66                           | 0.3532                 | <0.001                         |
| <i>Sessions</i>                     | <i>F</i>       | $F_{3,69}$<br>= 6.439 | $F_{4,92}$<br>= 2.328 | $F_{4,414,101.516}$<br>= 70.436 | $F_{2,02,46.471}$<br>= 13.411 | $F_{2,214,50.917}$<br>= 1.63  | $F_{3,019,69.448}$<br>= 14.782 | $F_{2,092,48.111}$<br>= 1.401 | $F_{2,773,63.781}$<br>= 4.084 | $F_{4,613,106.110}$<br>= 1.744 | $F_{4,92}$<br>= 0.5445 | $F_{2,918,67.121}$<br>= 82.382 |
|                                     | <i>P value</i> | 0.0007                | 0.062                 | <0.001                          | <0.001                        | 0.204                         | <0.001                         | 0.256                         | 0.012                         | 0.136                          | 0.7034                 | <0.001                         |
| <i>Genotypes</i>                    | <i>F</i>       | $F_{2,23}$<br>= 1.599 | $F_{2,23}$<br>= 7.05  | $F_{2,23}$<br>= 13.288          | $F_{2,23}$<br>= 0.895         | $F_{2,23}$<br>= 2.625         | $F_{2,23}$<br>= 3.027          | $F_{2,23}$<br>= 2.928         | $F_{2,23}$<br>= 3.755         | $F_{2,23}$<br>= 2.728          | $F_{2,23}$<br>= 6.473  | $F_{2,23}$<br>= 2.834          |
|                                     | <i>P value</i> | 0.2237                | 0.0041                | <0.001                          | 0.422                         | 0.094                         | 0.068                          | 0.074                         | 0.039                         | 0.087                          | 0.0059                 | 0.079                          |

\*, significant difference in Mauchly's test of sphericity
