# Supplementary material
Source: PubMed Central journal article supplement (PMC5109995)
Supplement: mnp-0002-0124-s02.pdf [file mnp-0002-0124-s02.pdf]

# Supplementary figure 1

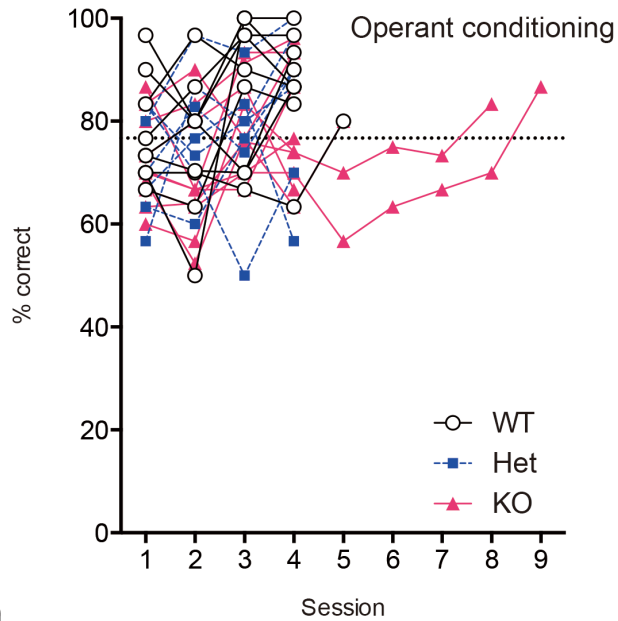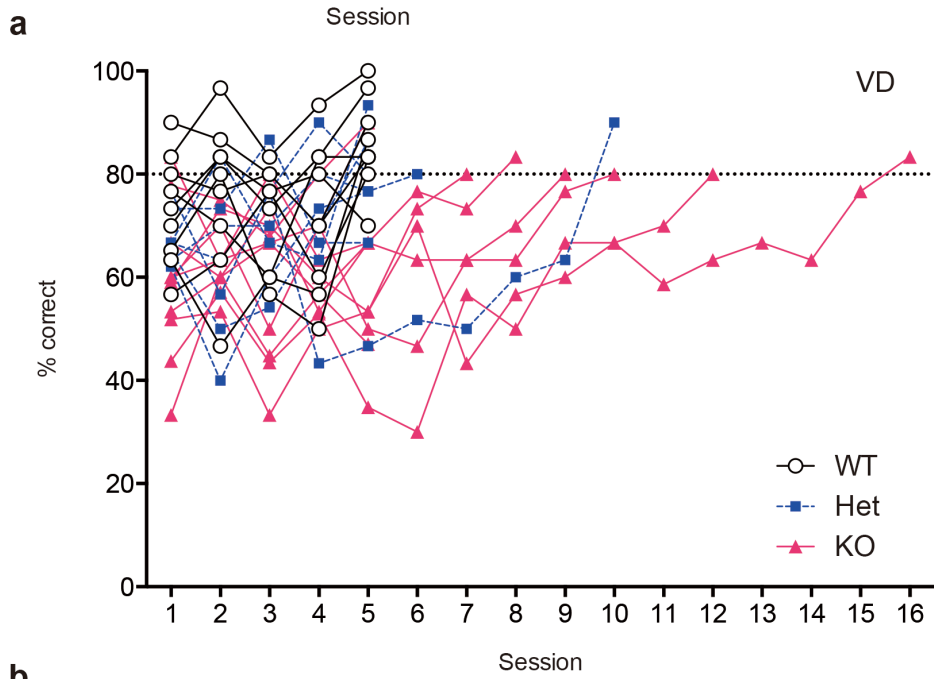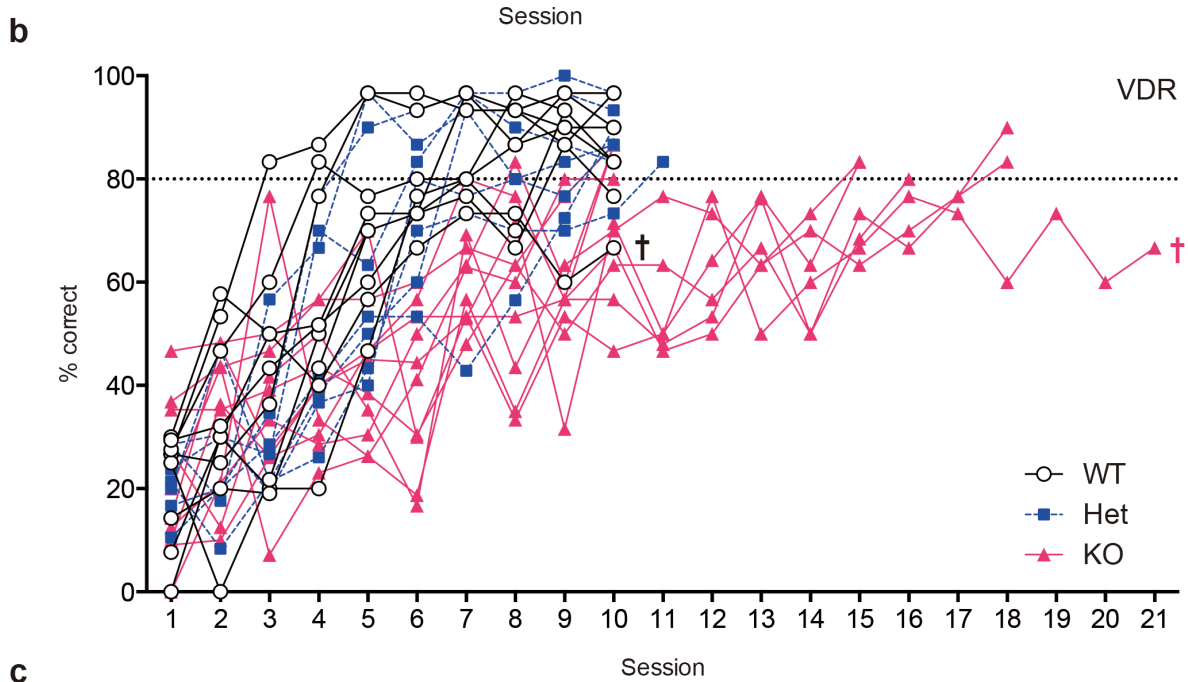

**Supplementary figure 1.** The acquisition curves of individual mice of the genotypes in the operant conditioning (a), VD (b) and VDR (c) tasks. WT (open circle), n=9; D2L-Het (blue square), n=7; D2L-KO (red triangle), n=10. Each criterion is shown as a dotted line (operant conditioning task: 76.7%, VD and VDR tasks: 80%). †, accidental death.
