# Supplementary material
Source: PubMed Central journal article supplement (PMC5109995)
Supplement: mnp-0002-0124-s03.pdf [file mnp-0002-0124-s03.pdf]

## Supplementary figure 2

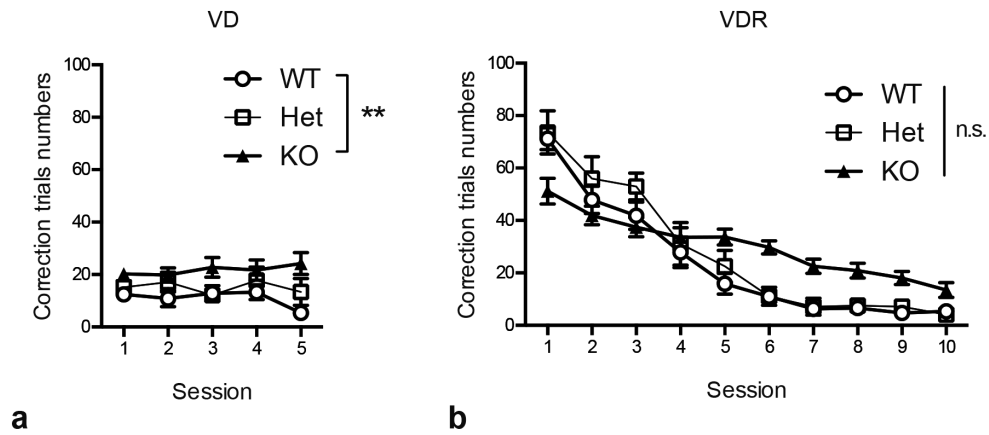

**Supplementary figure 2.** The number of correction trials in VD (**a**) and VDR (**b**) tasks. Marks and error bars represent the mean  $\pm$  SEM. WT (open circle),  $n=9$ ; D2L-Het (open square),  $n=7$ ; D2L-KO (closed triangle),  $n=10$ . When two-way, one repeated measure ANOVAs were performed, the homogeneity of variance was checked with Mauchly's test of sphericity. There was no significant difference in Mauchly's test of sphericity in the VD task ( $P = 0.064$ ), thus we evaluated  $P$ -values without corrections by degrees of freedom. On the other hand, there was significant difference in Mauchly's test of sphericity in the VDR task ( $P < 0.001$ ), thus  $P$ -values were corrected by the Greenhouse-Geisser method ( $\epsilon = 0.324$ ). Two-way, one repeated measure ANOVA showed significant effects of genotypes but not interaction in the VD task (**a**, effect of interaction,  $F_{8, 92} = 1.126$ ,  $P = 0.3532$ ; effect of sessions,  $F_{4, 92} = 0.5445$ ,  $P = 0.7034$ ; effect of genotypes,  $F_{2, 23} = 6.473$ ,  $P = 0.0059$ ), significant effects of interaction but not genotypes in the VDR task (**b**, effect of interaction,  $F_{5.837, 67.121} = 4.975$ ,  $P < 0.001$ ; effect of sessions,  $F_{2.918, 67.121} = 82.382$ ,  $P < 0.001$ ; effect of genotypes,  $F_{2, 23} = 2.834$ ,  $P = 0.079$ ). *Post hoc* Bonferroni comparisons for the main effect of genotypes,  $^{**}P < 0.01$ . See Supplementary table 1 for detailed statistical information in two-way, one repeated measure ANOVA.
